# Supplementary material for: Soil and Biomass Carbon Storage is Much Higher in Central American than Andean Montane Forests
Source: Copernicus journal article supplement (doi:10.5194/egusphere-2024-2738), 2024-09-20
Supplement: Supplementary file 1 [file egusphere-2024-2738-supplement.pdf]

*Supplement of*

## **Soil and Biomass Carbon Storage is Much Higher in Central American than Andean Montane Forests**

**Cecilia M Prada et al.**

*Correspondence to:* Cecilia M Prada ([ceprada@gmail.com](mailto:ceprada@gmail.com))

### **Supplementary Material**

Tables S1-S5, and Figures S1-S5.

**Table S1** Data use to compare AGB among other Neotropical studies. Aboveground biomass in Mg ha<sup>-1</sup>. EM: Studies that report ectomycorrhizal trees. y = presence; n = absence

| <b>Elevation<br/>(m asl)</b> | <b>Forest type</b> | <b>AGB</b> | <b>Country</b> | <b>Study</b>       | <b>EM</b> |
|------------------------------|--------------------|------------|----------------|--------------------|-----------|
| 880                          | lowland            | 231        | Panama         | This study         | y         |
| 1100                         | montane            | 185.7      | Panama         | This study         | y         |
| 1100                         | montane            | 311        | Panama         | This study         | y         |
| 1155                         | montane            | 369.3      | Panama         | This study         | y         |
| 1215                         | montane            | 264.7      | Panama         | This study         | y         |
| 1330                         | montane            | 407.2      | Panama         | This study         | y         |
| 1987                         | montane            | 386.9      | Panama         | This study         | y         |
| 2248                         | montane            | 469.9      | Panama         | This study         | y         |
| 2599                         | montane            | 576.9      | Panama         | This study         | y         |
| 2923                         | montane            | 516.5      | Panama         | This study         | y         |
| 100                          | lowland            | 180.87     | Brazil         | Alves et al., 2011 | n         |
| 100                          | lowland            | 190.05     | Brazil         | Alves et al., 2011 | n         |
| 100                          | lowland            | 210.81     | Brazil         | Alves et al., 2011 | n         |
| 100                          | lowland            | 221.92     | Brazil         | Alves et al., 2011 | n         |
| 400                          | lowland            | 223.72     | Brazil         | Alves et al., 2011 | n         |
| 400                          | lowland            | 233.38     | Brazil         | Alves et al., 2011 | n         |
| 400                          | lowland            | 257.07     | Brazil         | Alves et al., 2011 | n         |
| 400                          | lowland            | 260.31     | Brazil         | Alves et al., 2011 | n         |
| 1000                         | lowland            | 242.36     | Brazil         | Alves et al., 2011 | n         |
| 1000                         | lowland            | 243.71     | Brazil         | Alves et al., 2011 | n         |
| 1000                         | lowland            | 277.79     | Brazil         | Alves et al., 2011 | n         |

|      |         |        |          |                            |   |
|------|---------|--------|----------|----------------------------|---|
| 1000 | lowland | 322.89 | Brazil   | Alves et al., 2011         | n |
| 41   | lowland | 225.28 | Colombia | González-Caro et al., 2020 | y |
| 59   | lowland | 272.32 | Colombia | González-Caro et al., 2020 | y |
| 128  | lowland | 218.6  | Colombia | González-Caro et al., 2020 | y |
| 166  | lowland | 217.08 | Colombia | González-Caro et al., 2020 | y |
| 167  | lowland | 201.52 | Colombia | González-Caro et al., 2020 | y |
| 171  | lowland | 321.16 | Colombia | González-Caro et al., 2020 | y |
| 190  | lowland | 181.08 | Colombia | González-Caro et al., 2020 | y |
| 203  | lowland | 109.92 | Colombia | González-Caro et al., 2020 | y |
| 232  | lowland | 296.6  | Colombia | González-Caro et al., 2020 | y |
| 234  | lowland | 187.4  | Colombia | González-Caro et al., 2020 | y |
| 234  | lowland | 200.56 | Colombia | González-Caro et al., 2020 | y |
| 235  | lowland | 221.2  | Colombia | González-Caro et al., 2020 | y |
| 241  | lowland | 124.04 | Colombia | González-Caro et al., 2020 | y |
| 248  | lowland | 290.2  | Colombia | González-Caro et al., 2020 | y |
| 250  | lowland | 160.28 | Colombia | González-Caro et al., 2020 | y |
| 261  | lowland | 79.68  | Colombia | González-Caro et al., 2020 | y |
| 265  | lowland | 280.04 | Colombia | González-Caro et al., 2020 | y |
| 266  | lowland | 128.04 | Colombia | González-Caro et al., 2020 | y |
| 266  | lowland | 394.12 | Colombia | González-Caro et al., 2020 | y |
| 267  | lowland | 259.6  | Colombia | González-Caro et al., 2020 | y |
| 272  | lowland | 223.32 | Colombia | González-Caro et al., 2020 | y |
| 273  | lowland | 110.88 | Colombia | González-Caro et al., 2020 | y |
| 276  | lowland | 175.56 | Colombia | González-Caro et al., 2020 | y |
| 278  | lowland | 317.12 | Colombia | González-Caro et al., 2020 | y |
| 279  | lowland | 267.32 | Colombia | González-Caro et al., 2020 | y |
| 285  | lowland | 140    | Colombia | González-Caro et al., 2020 | y |
| 288  | lowland | 162.56 | Colombia | González-Caro et al., 2020 | y |
| 288  | lowland | 175.72 | Colombia | González-Caro et al., 2020 | y |
| 296  | lowland | 97.36  | Colombia | González-Caro et al., 2020 | y |
| 296  | lowland | 142    | Colombia | González-Caro et al., 2020 | y |
| 296  | lowland | 265.76 | Colombia | González-Caro et al., 2020 | y |
| 296  | lowland | 319.36 | Colombia | González-Caro et al., 2020 | y |
| 299  | lowland | 203.6  | Colombia | González-Caro et al., 2020 | y |
| 302  | lowland | 319.6  | Colombia | González-Caro et al., 2020 | y |
| 304  | lowland | 128.52 | Colombia | González-Caro et al., 2020 | y |
| 304  | lowland | 200.76 | Colombia | González-Caro et al., 2020 | y |
| 304  | lowland | 321.96 | Colombia | González-Caro et al., 2020 | y |
| 304  | lowland | 371.56 | Colombia | González-Caro et al., 2020 | y |
| 312  | lowland | 223.76 | Colombia | González-Caro et al., 2020 | y |
| 312  | lowland | 353.32 | Colombia | González-Caro et al., 2020 | y |
| 314  | lowland | 373    | Colombia | González-Caro et al., 2020 | y |
| 318  | lowland | 301.68 | Colombia | González-Caro et al., 2020 | y |

|      |         |        |          |                            |   |
|------|---------|--------|----------|----------------------------|---|
| 329  | lowland | 122.32 | Colombia | González-Caro et al., 2020 | y |
| 330  | lowland | 265.52 | Colombia | González-Caro et al., 2020 | y |
| 338  | lowland | 242.44 | Colombia | González-Caro et al., 2020 | y |
| 349  | lowland | 137.4  | Colombia | González-Caro et al., 2020 | y |
| 359  | lowland | 126.92 | Colombia | González-Caro et al., 2020 | y |
| 449  | lowland | 279.04 | Colombia | González-Caro et al., 2020 | y |
| 473  | lowland | 344.04 | Colombia | González-Caro et al., 2020 | y |
| 510  | lowland | 241.16 | Colombia | González-Caro et al., 2020 | y |
| 586  | lowland | 167.92 | Colombia | González-Caro et al., 2020 | y |
| 691  | lowland | 217.4  | Colombia | González-Caro et al., 2020 | y |
| 749  | lowland | 214.36 | Colombia | González-Caro et al., 2020 | y |
| 764  | lowland | 232    | Colombia | González-Caro et al., 2020 | y |
| 772  | lowland | 280.04 | Colombia | González-Caro et al., 2020 | y |
| 928  | lowland | 285.8  | Colombia | González-Caro et al., 2020 | y |
| 941  | lowland | 230.68 | Colombia | González-Caro et al., 2020 | y |
| 960  | lowland | 250.2  | Colombia | González-Caro et al., 2020 | y |
| 972  | lowland | 383.6  | Colombia | González-Caro et al., 2020 | y |
| 977  | lowland | 191.48 | Colombia | González-Caro et al., 2020 | y |
| 1037 | montane | 286.08 | Colombia | González-Caro et al., 2020 | y |
| 1065 | montane | 313.44 | Colombia | González-Caro et al., 2020 | y |
| 1068 | montane | 324.8  | Colombia | González-Caro et al., 2020 | y |
| 1119 | montane | 297.84 | Colombia | González-Caro et al., 2020 | y |
| 1370 | montane | 283.84 | Colombia | González-Caro et al., 2020 | y |
| 1412 | montane | 315.48 | Colombia | González-Caro et al., 2020 | y |
| 1414 | montane | 192.8  | Colombia | González-Caro et al., 2020 | y |
| 1483 | montane | 295.4  | Colombia | González-Caro et al., 2020 | y |
| 1642 | montane | 380.44 | Colombia | González-Caro et al., 2020 | y |
| 1658 | montane | 625.04 | Colombia | González-Caro et al., 2020 | y |
| 1663 | montane | 421.28 | Colombia | González-Caro et al., 2020 | y |
| 1701 | montane | 561.48 | Colombia | González-Caro et al., 2020 | y |
| 1740 | montane | 225.24 | Colombia | González-Caro et al., 2020 | y |
| 1793 | montane | 561.96 | Colombia | González-Caro et al., 2020 | y |
| 1800 | montane | 246.16 | Colombia | González-Caro et al., 2020 | y |
| 1810 | montane | 245.88 | Colombia | González-Caro et al., 2020 | y |
| 1848 | montane | 398.88 | Colombia | González-Caro et al., 2020 | y |
| 1903 | montane | 209.64 | Colombia | González-Caro et al., 2020 | y |
| 1937 | montane | 493.32 | Colombia | González-Caro et al., 2020 | y |
| 1949 | montane | 589.12 | Colombia | González-Caro et al., 2020 | y |
| 2013 | montane | 211.4  | Colombia | González-Caro et al., 2020 | y |
| 2027 | montane | 173.08 | Colombia | González-Caro et al., 2020 | y |
| 2056 | montane | 177    | Colombia | González-Caro et al., 2020 | y |
| 2083 | montane | 185.36 | Colombia | González-Caro et al., 2020 | y |
| 2111 | montane | 264.28 | Colombia | González-Caro et al., 2020 | y |

|      |         |        |            |                            |   |
|------|---------|--------|------------|----------------------------|---|
| 2314 | montane | 193.92 | Colombia   | González-Caro et al., 2020 | y |
| 2364 | montane | 136.4  | Colombia   | González-Caro et al., 2020 | y |
| 2527 | montane | 358.48 | Colombia   | González-Caro et al., 2020 | y |
| 2646 | montane | 272.36 | Colombia   | González-Caro et al., 2020 | y |
| 2647 | montane | 160.76 | Colombia   | González-Caro et al., 2020 | y |
| 2802 | montane | 98.12  | Colombia   | González-Caro et al., 2020 | y |
| 2928 | montane | 218.56 | Colombia   | González-Caro et al., 2020 | y |
| 115  | lowland | 297    | Costa Rica | Hofhansl et al., 2020      | n |
| 210  | lowland | 240    | Costa Rica | Hofhansl et al., 2020      | n |
| 253  | lowland | 224    | Costa Rica | Hofhansl et al., 2020      | n |
| 315  | lowland | 370    | Costa Rica | Hofhansl et al., 2020      | n |
| 355  | lowland | 267    | Costa Rica | Hofhansl et al., 2020      | n |
| 100  | lowland | 182.9  | Costa Rica | Clark et al., 2002         | n |
| 101  | lowland | 160.5  | Costa Rica | Clark et al., 2002         | n |
| 102  | lowland | 186.1  | Costa Rica | Clark et al., 2002         | n |
| 1240 | montane | 159    | Costa Rica | Tanner et al., 2016        | n |
| 1490 | montane | 457    | Costa Rica | Tanner et al., 2016        | n |
| 100  | lowland | 278    | Costa Rica | Lieberman et al 1996       | n |
| 300  | lowland | 325    | Costa Rica | Lieberman et al 1996       | n |
| 500  | lowland | 261    | Costa Rica | Lieberman et al 1996       | n |
| 750  | lowland | 346    | Costa Rica | Lieberman et al 1996       | n |
| 1000 | lowland | 261    | Costa Rica | Lieberman et al 1996       | n |
| 1250 | montane | 145    | Costa Rica | Lieberman et al 1996       | n |
| 1500 | montane | 215    | Costa Rica | Lieberman et al 1996       | n |
| 1750 | montane | 268    | Costa Rica | Lieberman et al 1996       | n |
| 2000 | montane | 271    | Costa Rica | Lieberman et al 1996       | n |
| 2300 | montane | 349    | Costa Rica | Lieberman et al 1996       | n |
| 2600 | montane | 362    | Costa Rica | Lieberman et al 1996       | n |
| 1050 | montane | 285.1  | Ecuador    | Moser et al., 2008         | n |
| 1540 | montane | 167.1  | Ecuador    | Moser et al., 2008         | n |
| 1890 | montane | 169.6  | Ecuador    | Moser et al., 2008         | n |
| 2380 | montane | 98.92  | Ecuador    | Moser et al., 2008         | n |
| 3060 | montane | 103.4  | Ecuador    | Moser et al., 2008         | n |
| 171  | lowland | 281    | Panama     | Chave et al., 2003         | n |
| 120  | lowland | 130    | Peru       | Malhi et al., 2017         | n |
| 150  | lowland | 89     | Peru       | Malhi et al., 2017         | n |
| 215  | lowland | 112    | Peru       | Malhi et al., 2017         | n |
| 223  | lowland | 142    | Peru       | Malhi et al., 2017         | n |
| 595  | lowland | 97     | Peru       | Malhi et al., 2017         | n |
| 848  | lowland | 67     | Peru       | Malhi et al., 2017         | n |
| 1000 | lowland | 92     | Peru       | Malhi et al., 2017         | n |
| 1527 | montane | 107    | Peru       | Malhi et al., 2017         | n |
| 1776 | montane | 144.3  | Peru       | Malhi et al., 2017         | n |

|      |         |         |           |                       |   |
|------|---------|---------|-----------|-----------------------|---|
| 1885 | montane | 64.22   | Peru      | Malhi et al., 2017    | n |
| 2020 | montane | 50.65   | Peru      | Malhi et al., 2017    | n |
| 2758 | montane | 88.52   | Peru      | Malhi et al., 2017    | n |
| 2863 | montane | 65.03   | Peru      | Malhi et al., 2017    | n |
| 3044 | montane | 59.08   | Peru      | Malhi et al., 2017    | n |
| 3045 | montane | 81.32   | Peru      | Malhi et al., 2017    | n |
| 3537 | montane | 81.9    | Peru      | Malhi et al., 2017    | n |
| 800  | lowland | 70      | Venezuela | Delaney et al., 1997  | n |
| 1400 | montane | 173     | Venezuela | Delaney et al., 1997  | n |
| 1500 | montane | 148     | Venezuela | Delaney et al., 1997  | n |
| 2136 | montane | 157     | Venezuela | Delaney et al., 1997  | n |
| 2500 | montane | 179     | Venezuela | Delaney et al., 1997  | n |
| 50   | lowland | 47.66   | Venezuela | Vilanova et al., 2018 | n |
| 60   | lowland | 70.749  | Venezuela | Vilanova et al., 2018 | n |
| 100  | lowland | 96.122  | Venezuela | Vilanova et al., 2018 | n |
| 105  | lowland | 183.288 | Venezuela | Vilanova et al., 2018 | n |
| 105  | lowland | 201.301 | Venezuela | Vilanova et al., 2018 | n |
| 138  | lowland | 135.579 | Venezuela | Vilanova et al., 2018 | n |
| 140  | lowland | 150.246 | Venezuela | Vilanova et al., 2018 | n |
| 140  | lowland | 151.633 | Venezuela | Vilanova et al., 2018 | n |
| 141  | lowland | 113.5   | Venezuela | Vilanova et al., 2018 | n |
| 142  | lowland | 77.786  | Venezuela | Vilanova et al., 2018 | n |
| 143  | lowland | 102.64  | Venezuela | Vilanova et al., 2018 | n |
| 144  | lowland | 206.23  | Venezuela | Vilanova et al., 2018 | n |
| 165  | lowland | 80.404  | Venezuela | Vilanova et al., 2018 | n |
| 168  | lowland | 114.254 | Venezuela | Vilanova et al., 2018 | n |
| 169  | lowland | 150.581 | Venezuela | Vilanova et al., 2018 | n |
| 171  | lowland | 115.821 | Venezuela | Vilanova et al., 2018 | n |
| 173  | lowland | 117.096 | Venezuela | Vilanova et al., 2018 | n |
| 176  | lowland | 113.483 | Venezuela | Vilanova et al., 2018 | n |
| 180  | lowland | 133.051 | Venezuela | Vilanova et al., 2018 | n |
| 180  | lowland | 174.418 | Venezuela | Vilanova et al., 2018 | n |
| 220  | lowland | 234.506 | Venezuela | Vilanova et al., 2018 | n |
| 220  | lowland | 237.089 | Venezuela | Vilanova et al., 2018 | n |
| 244  | lowland | 266.224 | Venezuela | Vilanova et al., 2018 | n |
| 283  | lowland | 128.517 | Venezuela | Vilanova et al., 2018 | n |
| 312  | lowland | 226.454 | Venezuela | Vilanova et al., 2018 | n |
| 316  | lowland | 125.518 | Venezuela | Vilanova et al., 2018 | n |
| 318  | lowland | 225.897 | Venezuela | Vilanova et al., 2018 | n |
| 350  | lowland | 144.203 | Venezuela | Vilanova et al., 2018 | n |
| 366  | lowland | 156.565 | Venezuela | Vilanova et al., 2018 | n |
| 380  | lowland | 81.251  | Venezuela | Vilanova et al., 2018 | n |
| 404  | lowland | 136.338 | Venezuela | Vilanova et al., 2018 | n |

|      |         |         |           |                       |   |
|------|---------|---------|-----------|-----------------------|---|
| 760  | lowland | 204.805 | Venezuela | Vilanova et al., 2018 | n |
| 1000 | lowland | 176.848 | Venezuela | Vilanova et al., 2018 | n |
| 1150 | montane | 237.27  | Venezuela | Vilanova et al., 2018 | n |
| 1320 | montane | 257.185 | Venezuela | Vilanova et al., 2018 | n |
| 1500 | montane | 159.029 | Venezuela | Vilanova et al., 2018 | n |
| 2040 | montane | 205.316 | Venezuela | Vilanova et al., 2018 | n |
| 2060 | montane | 204.674 | Venezuela | Vilanova et al., 2018 | n |
| 2310 | montane | 136.293 | Venezuela | Vilanova et al., 2018 | n |
| 2312 | montane | 140.132 | Venezuela | Vilanova et al., 2018 | n |
| 2318 | montane | 173.818 | Venezuela | Vilanova et al., 2018 | n |
| 2320 | montane | 113.619 | Venezuela | Vilanova et al., 2018 | n |
| 2321 | montane | 190.334 | Venezuela | Vilanova et al., 2018 | n |
| 2421 | montane | 224.87  | Venezuela | Vilanova et al., 2018 | n |
| 2430 | montane | 184.798 | Venezuela | Vilanova et al., 2018 | n |
| 2430 | montane | 179.899 | Venezuela | Vilanova et al., 2018 | n |
| 2449 | montane | 170.767 | Venezuela | Vilanova et al., 2018 | n |
| 2450 | montane | 154.846 | Venezuela | Vilanova et al., 2018 | n |
| 2450 | montane | 185.327 | Venezuela | Vilanova et al., 2018 | n |
| 2452 | montane | 171.071 | Venezuela | Vilanova et al., 2018 | n |

**Table S2.** Linear regressions for carbon pools with environmental factors.

| Variable             | AGB   |        | D_CWD |         | S_CWD |       | Soil C |        |
|----------------------|-------|--------|-------|---------|-------|-------|--------|--------|
|                      | r     | P      | r     | P       | r     | P     | r      | P      |
| BD                   | 0.16  | 0.13   | 0.05  | 0.253   | -0.08 | 0.614 | 0.02   | 0.305  |
| pH                   | 0.09  | 0.204  | -0.06 | 0.508   | 0.15  | 0.141 | 0.15   | 0.143  |
| ResinP <sup>‡</sup>  | 0.71  | 0.001* | 0.3   | 0.055 * | 0.03  | 0.287 | 0.39   | 0.03*  |
| NH4 <sup>‡</sup>     | 0.1   | 0.194  | -0.12 | 0.918   | -0.04 | 0.47  | -0.08  | 0.598  |
| NO3 <sup>‡</sup>     | -0.11 | 0.779  | -0.05 | 0.498   | -0.11 | 0.801 | -0.12  | 0.928  |
| Al <sup>§</sup>      | -0.07 | 0.554  | -0.12 | 0.989   | -0.07 | 0.54  | 0.06   | 0.243  |
| Ca <sup>§</sup>      | -0.02 | 0.413  | -0.1  | 0.725   | 0     | 0.352 | 0.24   | 0.084  |
| Fe <sup>§</sup>      | 0.14  | 0.149  | -0.05 | 0.498   | -0.11 | 0.779 | 0.02   | 0.308  |
| K <sup>§</sup>       | 0.02  | 0.292  | -0.09 | 0.67    | 0.31  | 0.054 | 0      | 0.33   |
| Mg <sup>§</sup>      | -0.12 | 0.873  | -0.1  | 0.725   | -0.05 | 0.488 | -0.05  | 0.479  |
| Mn <sup>§</sup>      | -0.1  | 0.716  | 0.04  | 0.263   | -0.07 | 0.569 | 0.14   | 0.15   |
| Na <sup>§</sup>      | -0.07 | 0.566  | 0.5   | 0.012*  | 0     | 0.334 | 0      | 0.342  |
| ECEC <sup>§</sup>    | -0.08 | 0.582  | -0.12 | 0.928   | 0     | 0.366 | 0.12   | 0.171  |
| Total.N <sup>†</sup> | -0.04 | 0.452  | -0.11 | 0.757   | -0.11 | 0.805 | 0.12   | 0.17   |
| Total.P <sup>†</sup> | -0.02 | 0.4    | -0.1  | 0.731   | 0     | 0.357 | -0.01  | 0.38   |
| MAT                  | 0.76  | 0*     | 0.68  | 0.001*  | 0     | 0.361 | 0.77   | 0*     |
| MAP                  | 0.16  | 0.13   | 0.2   | 0.107   | 0.22  | 0.093 | -0.02  | 0.403  |
| MPwe                 | -0.12 | 0.976  | -0.08 | 0.595   | -0.08 | 0.586 | -0.02  | 0.392  |
| MPdry                | 0.22  | 0.093  | 0.39  | 0.03*   | -0.01 | 0.378 | 0.41   | 0.025* |
| MDR                  | 0.49  | 0.013* | 0.12  | 0.173   | 0.06  | 0.233 | 0.31   | 0.054  |
| ISO                  | 0.1   | 0.184  | 0.31  | 0.053   | -0.1  | 0.728 | 0.29   | 0.061  |
| TS                   | 0.08  | 0.216  | 0.3   | 0.058   | -0.09 | 0.66  | 0.25   | 0.078  |

|        |      |        |      |        |       |       |      |        |
|--------|------|--------|------|--------|-------|-------|------|--------|
| MATmax | 0.76 | 0*     | 0.68 | 0.001* | 0     | 0.359 | 0.77 | 0*     |
| MATmin | 0.76 | 0*     | 0.68 | 0.001* | 0     | 0.351 | 0.77 | 0*     |
| MATvar | 0.56 | 0.007* | 0.5  | 0.012* | 0.01  | 0.321 | 0.74 | 0*     |
| WC     | 0.36 | 0.039* | 0.13 | 0.16   | -0.11 | 0.802 | 0.41 | 0.025* |



**Table S3.** Correlation between variables used for the SEM analysis.

|                              | MAT      | ResinP <sup>‡</sup> | NH <sub>4</sub> <sup>‡</sup> | Soil<br>paraments | Climate<br>parameter | % EM  | AGB   | DCWD   | Soil C |
|------------------------------|----------|---------------------|------------------------------|-------------------|----------------------|-------|-------|--------|--------|
| ResinP <sup>‡</sup>          | -0.89*** |                     |                              |                   |                      |       |       |        |        |
| NH <sub>4</sub> <sup>‡</sup> | -0.21    | 0.43                |                              |                   |                      |       |       |        |        |
| Soil paraments               | -0.95*** | 0.89***             | 0.14                         |                   |                      |       |       |        |        |
| Climate<br>parameter         | 0.17     | -0.29               | -0.60                        | 0.0               |                      |       |       |        |        |
| % EM                         | -0.76*   | 0.79**              | 0.31                         | 0.73*             | 0.0                  |       |       |        |        |
| AGB                          | -0.85*** | 0.87**              | 0.45                         | 0.81**            | -0.36                | 0.74* |       |        |        |
| DCWD                         | -0.89**  | 0.62                | -0.04                        | 0.80**            | -0.08                | 0.70* | 0.72* |        |        |
| Soil C                       | -0.89*** | 0.68*               | 0.19                         | 0.86**            | -0.11                | 0.54  | 0.71* | 0.81** |        |

**Table S4.** Environmental characteristics of ten 1ha plots along an elevational gradient in Panama. Soil data are means ( $\pm$  SE) of 13 samples of 0-10 cm depth per plot. Superscripts report significant differences among sites, based on one-way ANOVA. Climate data from the CHELSA database.

| Plot                         | PaloSeco                        | Alto Frio                       | ChorroA                        | HondaA                         | Samudio                        | Hornito                        | Mirador                         | CasaA                           | Quetzal                         | Copete                         |
|------------------------------|---------------------------------|---------------------------------|--------------------------------|--------------------------------|--------------------------------|--------------------------------|---------------------------------|---------------------------------|---------------------------------|--------------------------------|
| Plot code                    | PS                              | AF                              | CA                             | HA                             | SAM                            | HOR                            | MIR                             | CASA                            | QUE                             | COP                            |
| <b>Edaphic</b>               |                                 |                                 |                                |                                |                                |                                |                                 |                                 |                                 |                                |
| BD                           | 0.41 $\pm$ 0.03 <sup>cde</sup>  | 0.65 $\pm$ 0.02 <sup>ab</sup>   | 0.12 $\pm$ 0.01 <sup>f</sup>   | 0.29 $\pm$ 0.02 <sup>def</sup> | 0.39 $\pm$ 0.0 <sup>cde</sup>  | 0.25 $\pm$ 0.02 <sup>cf</sup>  | 0.43 $\pm$ 0.03 <sup>cb</sup>   | 0.74 $\pm$ 0.04 <sup>a</sup>    | 0.54 $\pm$ 0.05 <sup>bc</sup>   | 0.51 $\pm$ 0.05 <sup>bc</sup>  |
| pH                           | 4.37 $\pm$ 0.09 <sup>cde</sup>  | 5.6 $\pm$ 0.06 <sup>ab</sup>    | 3.67 $\pm$ 0.08 <sup>c</sup>   | 3.58 $\pm$ 0.05 <sup>3</sup>   | 4.18 $\pm$ 0.13 <sup>de</sup>  | 5.03 $\pm$ 0.18 <sup>bcd</sup> | 5.98 $\pm$ 0.11 <sup>a</sup>    | 5.0 $\pm$ 0.15 <sup>bc</sup>    | 5.08 $\pm$ 0.19 <sup>bc</sup>   | 4.81 $\pm$ 0.14 <sup>cd</sup>  |
| ResinP <sup>‡</sup>          | 0.43 $\pm$ 0.06 <sup>d</sup>    | 1.39 $\pm$ 0.13 <sup>cd</sup>   | 0.08 $\pm$ 0.02 <sup>d</sup>   | 0.22 $\pm$ 0.05 <sup>d</sup>   | 0.41 $\pm$ 0.08 <sup>d</sup>   | 2.22 $\pm$ 0.15 <sup>bcd</sup> | 3.67 $\pm$ 0.33 <sup>bc</sup>   | 7.01 $\pm$ 1.08 <sup>a</sup>    | 6.51 $\pm$ 0.93 <sup>a</sup>    | 4.57 $\pm$ 0.67 <sup>ab</sup>  |
| NH <sub>4</sub> <sup>‡</sup> | 0.78 $\pm$ 0.06 <sup>b</sup>    | 3.75 $\pm$ 0.66 <sup>a</sup>    | 0.81 $\pm$ 0.06 <sup>b</sup>   | 2.24 $\pm$ 0.46 <sup>ab</sup>  | 0.63 $\pm$ 0.1 <sup>b</sup>    | 1.81 $\pm$ 0.25 <sup>ab</sup>  | 1.8 $\pm$ 0.2 <sup>ab</sup>     | 2.81 $\pm$ 1.09 <sup>ab</sup>   | 2.58 $\pm$ 0.26 <sup>ab</sup>   | 1.29 $\pm$ 0.25 <sup>b</sup>   |
| NO <sub>3</sub> <sup>‡</sup> | 0.81 $\pm$ 0.12 <sup>cd</sup>   | 2.56 $\pm$ 0.23 <sup>a</sup>    | 0.2 $\pm$ 0.06 <sup>d</sup>    | 1.19 $\pm$ 0.29 <sup>bcd</sup> | 1.17 $\pm$ 0.14 <sup>bcd</sup> | 1.18 $\pm$ 0.17 <sup>bcd</sup> | 1.55 $\pm$ 0.13 <sup>bc</sup>   | 0.23 $\pm$ 0.15 <sup>d</sup>    | 1.96 $\pm$ 0.4 <sup>ab</sup>    | 0.28 $\pm$ 0.13 <sup>d</sup>   |
| Al <sup>§</sup>              | 1.1 $\pm$ 0.15 <sup>ab</sup>    | 0.03 $\pm$ 0.0 <sup>c</sup>     | 0.82 $\pm$ 0.13 <sup>abc</sup> | 1.13 $\pm$ 0.13 <sup>ab</sup>  | 1.59 $\pm$ 0.3 <sup>a</sup>    | 0.48 $\pm$ 0.22 <sup>abc</sup> | 0.06 $\pm$ 0.01 <sup>c</sup>    | 1.31 $\pm$ 0.19 <sup>a</sup>    | 0.44 $\pm$ 0.15 <sup>bc</sup>   | 0.8 $\pm$ 0.18 <sup>abc</sup>  |
| Ca <sup>§</sup>              | 1.08 $\pm$ 0.2 <sup>c</sup>     | 8.47 $\pm$ 0.28 <sup>b</sup>    | 0.54 $\pm$ 0.13 <sup>c</sup>   | 0.04 $\pm$ 0.0 <sup>c</sup>    | 1.12 $\pm$ 0.15 <sup>c</sup>   | 4.93 $\pm$ 0.74 <sup>bc</sup>  | 16.33 $\pm$ 0.96 <sup>a</sup>   | 2.44 $\pm$ 0.42 <sup>c</sup>    | 7.02 $\pm$ 1.24 <sup>b</sup>    | 3.55 $\pm$ 1.11 <sup>bc</sup>  |
| Fe <sup>§</sup>              | 0.01 $\pm$ 0.0 <sup>bc</sup>    | <0.01 <sup>c</sup>              | 0.05 $\pm$ 0.0 <sup>ab</sup>   | 0.02 $\pm$ 0.0 <sup>abc</sup>  | 0.06 $\pm$ 0.02 <sup>a</sup>   | <0.01 <sup>c</sup>             | <0.01 <sup>c</sup>              | 0.02 $\pm$ 0.0 <sup>bc</sup>    | 0.01 $\pm$ 0.0 <sup>bc</sup>    | 0.01 $\pm$ 0.0 <sup>c</sup>    |
| K <sup>§</sup>               | 0.06 $\pm$ 0.0 <sup>ab</sup>    | 0.12 $\pm$ 0.0 <sup>ab</sup>    | 0.07 $\pm$ 0.0 <sup>ab</sup>   | 0.02 $\pm$ 0.0 <sup>b</sup>    | 0.07 $\pm$ 0.0 <sup>ab</sup>   | 0.18 $\pm$ 0.01 <sup>a</sup>   | 0.16 $\pm$ 0.02 <sup>a</sup>    | 0.11 0 $\pm$ 0.02 <sup>ab</sup> | 0.1 $\pm$ 0.01 <sup>ab</sup>    | 0.11 $\pm$ 0.01 <sup>ab</sup>  |
| Mg <sup>§</sup>              | 0.33 $\pm$ 0.03 <sup>bc</sup>   | 2.29 $\pm$ 0.14 <sup>a</sup>    | 0.28 $\pm$ 0.03 <sup>bc</sup>  | 0.04 $\pm$ 0.0 <sup>c</sup>    | 0.32 $\pm$ 0.03 <sup>bc</sup>  | 1.01 $\pm$ 0.14 <sup>b</sup>   | 1.96 $\pm$ 0.25 <sup>a</sup>    | 0.44 $\pm$ 0.04 <sup>bc</sup>   | 0.77 $\pm$ 0.1 <sup>bc</sup>    | 0.41 $\pm$ 0.1 <sup>bc</sup>   |
| Mn <sup>§</sup>              | 0.19 $\pm$ 0.05 <sup>bc</sup>   | 0.42 $\pm$ 0.06 <sup>b</sup>    | 0.01 $\pm$ 0.0 <sup>c</sup>    | <0.01 <sup>c</sup>             | 0.14 $\pm$ 0.04 <sup>c</sup>   | 0.71 $\pm$ 0.1 <sup>a</sup>    | <0.01 <sup>c</sup>              | <0.0 <sup>c</sup>               | 0.02 $\pm$ 0.0 <sup>c</sup>     | 0.01 $\pm$ 0.0 <sup>c</sup>    |
| Na <sup>§</sup>              | 0.04 $\pm$ 0.0 <sup>b</sup>     | 0.02 $\pm$ 0.0 <sup>b</sup>     | 0.03 $\pm$ 0.0 <sup>b</sup>    | 0.01 $\pm$ 0.0 <sup>b</sup>    | 0.05 $\pm$ 0.0 <sup>b</sup>    | 0.03 $\pm$ 0.0 <sup>b</sup>    | 0.01 $\pm$ 0.0 <sup>b</sup>     | 0.02 $\pm$ 0 <sup>b</sup>       | 0.02 $\pm$ 0.0 <sup>b</sup>     | 0.11 $\pm$ 0.01 <sup>a</sup>   |
| ECEC <sup>§</sup>            | 2.83 $\pm$ 0.17 <sup>d</sup>    | 11.37 $\pm$ 0.36 <sup>b</sup>   | 1.82 $\pm$ 0.07 <sup>d</sup>   | 1.29 $\pm$ 0.14 <sup>d</sup>   | 3.37 $\pm$ 0.13 <sup>cd</sup>  | 7.39 $\pm$ 0.69 <sup>bcd</sup> | 18.47 $\pm$ 1.16 <sup>a</sup>   | 3.03 $\pm$ 0.45 <sup>b</sup>    | 7.93 $\pm$ 1.34 <sup>bc</sup>   | 4.2 $\pm$ 1.19 <sup>cd</sup>   |
| TEB <sup>§</sup>             | 1.52 $\pm$ 0.23 <sup>d</sup>    | 10.91 $\pm$ 0.33 <sup>b</sup>   | 0.93 $\pm$ 0.16 <sup>d</sup>   | 0.13 $\pm$ 0.0 <sup>d</sup>    | 1.57 $\pm$ 0.18 <sup>d</sup>   | 6.17 $\pm$ 0.87 <sup>bcd</sup> | 18.55 $\pm$ 1.15 <sup>a</sup>   | 4.37 $\pm$ 0.33 <sup>cd</sup>   | 8.41 $\pm$ 1.23 <sup>bc</sup>   | 5.03 $\pm$ 1.13 <sup>cd</sup>  |
| Total N <sup>†</sup>         | 2.28 $\pm$ 0.23 <sup>cd</sup>   | 4.71 $\pm$ 0.22 <sup>a</sup>    | 1.76 $\pm$ 0.15 <sup>d</sup>   | 2.91 $\pm$ 0.19 <sup>bc</sup>  | 3.6 $\pm$ 0.17 <sup>b</sup>    | 2.86 $\pm$ 0.13 <sup>bc</sup>  | 5.51 $\pm$ 0.25 <sup>bc</sup>   | 3.2 $\pm$ 0.2 <sup>bc</sup>     | 3.66 $\pm$ 0.25 <sup>b</sup>    | 2.98 $\pm$ 0.29 <sup>bc</sup>  |
| Total P <sup>*</sup>         | 369.21 $\pm$ 23.2 <sup>ab</sup> | 503.02 $\pm$ 27.02 <sup>a</sup> | 57.16 $\pm$ 8.64 <sup>d</sup>  | 180.6 $\pm$ 11.3 <sup>cd</sup> | 269.11 $\pm$ 9.8 <sup>bc</sup> | 280.1 $\pm$ 20.1 <sup>bc</sup> | 512.34 $\pm$ 42.01 <sup>a</sup> | 371.82 $\pm$ 44.7 <sup>ab</sup> | 376.73 $\pm$ 54.6 <sup>ab</sup> | 276.1 $\pm$ 60.5 <sup>bc</sup> |
| <b>Climate</b>               |                                 |                                 |                                |                                |                                |                                |                                 |                                 |                                 |                                |
| MAT                          | 20.8                            | 19.4                            | 19.4                           | 18.9                           | 18.5                           | 18.1                           | 14.4                            | 13.9                            | 10.9                            | 10.9                           |
| MAP                          | 2972                            | 2901                            | 2573                           | 2708                           | 3142                           | 3024                           | 2948                            | 2937                            | 3102                            | 3102                           |
| MPwe                         | 367                             | 447                             | 326                            | 343                            | 393                            | 439                            | 345                             | 343                             | 365                             | 365                            |

|        |      |       |       |        |       |        |         |         |         |        |
|--------|------|-------|-------|--------|-------|--------|---------|---------|---------|--------|
| MPdry  | 71   | 31    | 51    | 54     | 58    | 38     | 90      | 89      | 88      | 88     |
| MDR    | 43   | 42    | 43    | 43     | 43    | 42     | 42      | 42      | 42      | 42     |
| ISO    | 605  | 592   | 601   | 603    | 600   | 595    | 607     | 606     | 608     | 608    |
| TS     | 48.2 | 53.3  | 49.6  | 49.3   | 50.1  | 52.1   | 47.8    | 47.9    | 47.2    | 47.2   |
| MTmax  | 25   | 23.6  | 23.6  | 23.1   | 22.7  | 22.3   | 18.4    | 17.9    | 14.9    | 14.9   |
| MTmin  | 17.8 | 16.5  | 16.4  | 16     | 15.6  | 15.1   | 11.5    | 11      | 8       | 8      |
| MATvar | 7.1  | 7.1   | 7.1   | 7.1    | 7.1   | 7.1    | 6.9     | 6.9     | 6.9     | 6.9    |
| WC     | 0    | -0.62 | -1.66 | -75.16 | -1.66 | -42.16 | -225.08 | -225.08 | -117.83 | -117.8 |

---

‡units  $\mu\text{g cm}^{-3}$ ; §units  $\text{Cm L}^{-1}$ ; ¶units  $\text{mg cm}^{-3}$ ; \*units  $\mu\text{g cm}^{-3}$

**Table S5.** Correlations of soil and climate variables with elevation.

| Variable                     | r     | P         | Variable | r     | P         |
|------------------------------|-------|-----------|----------|-------|-----------|
| BD                           | 0.49  | 0.1492    | MAT      | -0.99 | <0.001*** |
| pH                           | 0.41  | 0.2339    | MAP      | 0.48  | 0.1636    |
| ResinP <sup>‡</sup>          | 0.88  | 0.0008*** | MPwe     | -0.26 | 0.4635    |
| NH <sub>4</sub> <sup>‡</sup> | 0.19  | 0.6061    | MPdry    | 0.77  | 0.0092**  |
| NO <sub>3</sub> <sup>‡</sup> | -0.16 | 0.6685    | MDR      | -0.67 | 0.0331*   |
| Al <sup>§</sup>              | -0.14 | 0.6904    | ISO      | 0.66  | 0.0381*   |
| Ca <sup>§</sup>              | 0.31  | 0.3847    | TS       | -0.65 | 0.0429*   |
| Fe <sup>§</sup>              | -0.3  | 0.408     | MTmax    | -0.99 | <0.001*** |
| K <sup>§</sup>               | 0.34  | 0.3372    | MTmin    | -0.99 | <0.001*** |
| Mg <sup>§</sup>              | 0     | 0.9948    | MATvar   | -0.93 | <0.001*** |
| Mn <sup>§</sup>              | -0.41 | 0.2369    | WC       | -0.72 | 0.0196*   |
| Na <sup>§</sup>              | 0.43  | 0.2113    | A. Cloud | -0.51 | 0.133     |
| ECEC <sup>§</sup>            | 0.19  | 0.5913    |          |       |           |
| Total.N <sup>†</sup>         | 0.23  | 0.518     | EM %     | 0.80  | 0.005**   |
| Total.P <sup>†</sup>         | 0.22  | 0.532     |          |       |           |

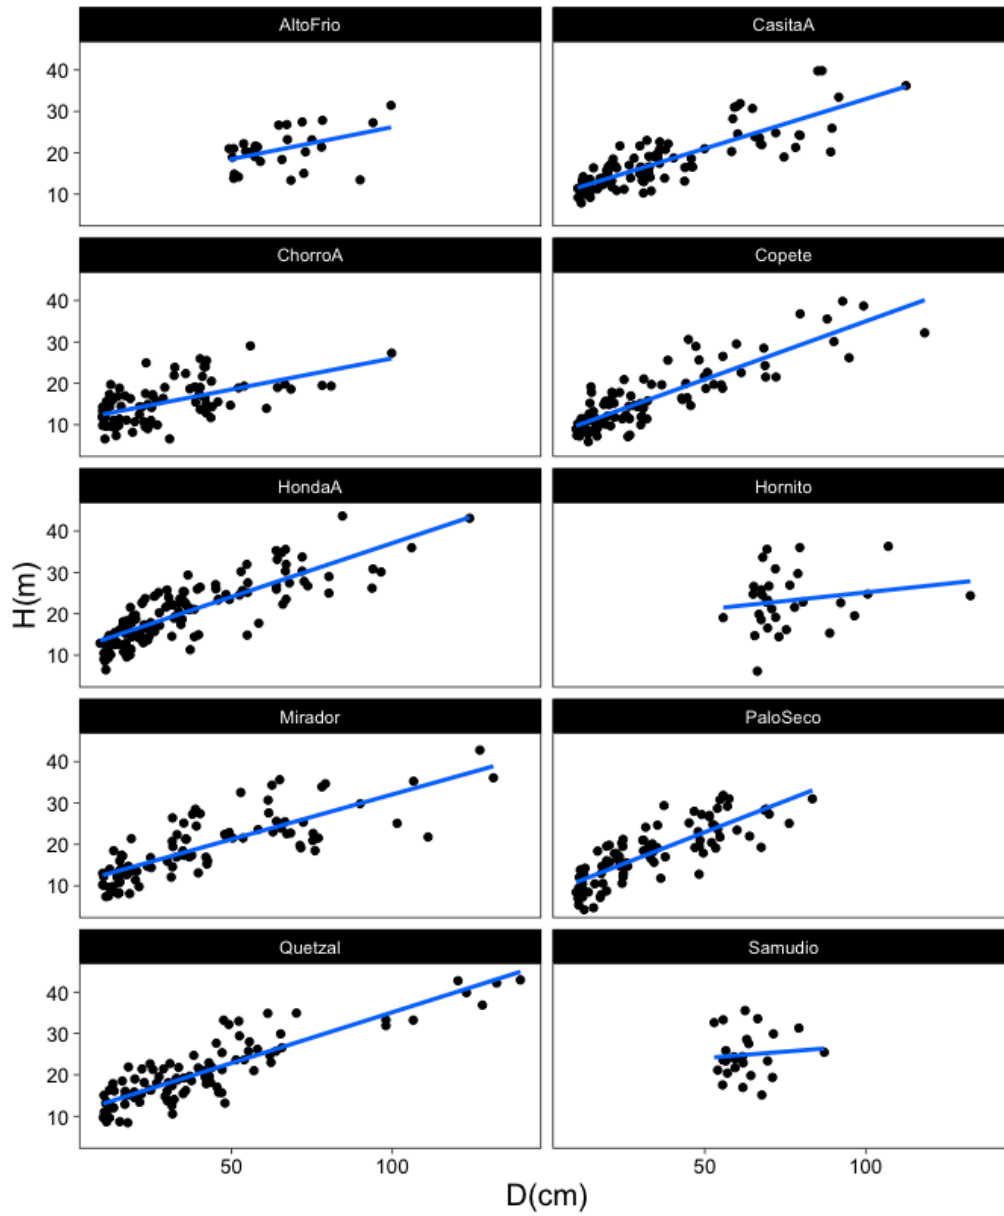

**Figure S1.** Data used to estimate height by plot height-diameter model using a power model.

Line represents the model  $\log_1 (H=a+b*D)$ .

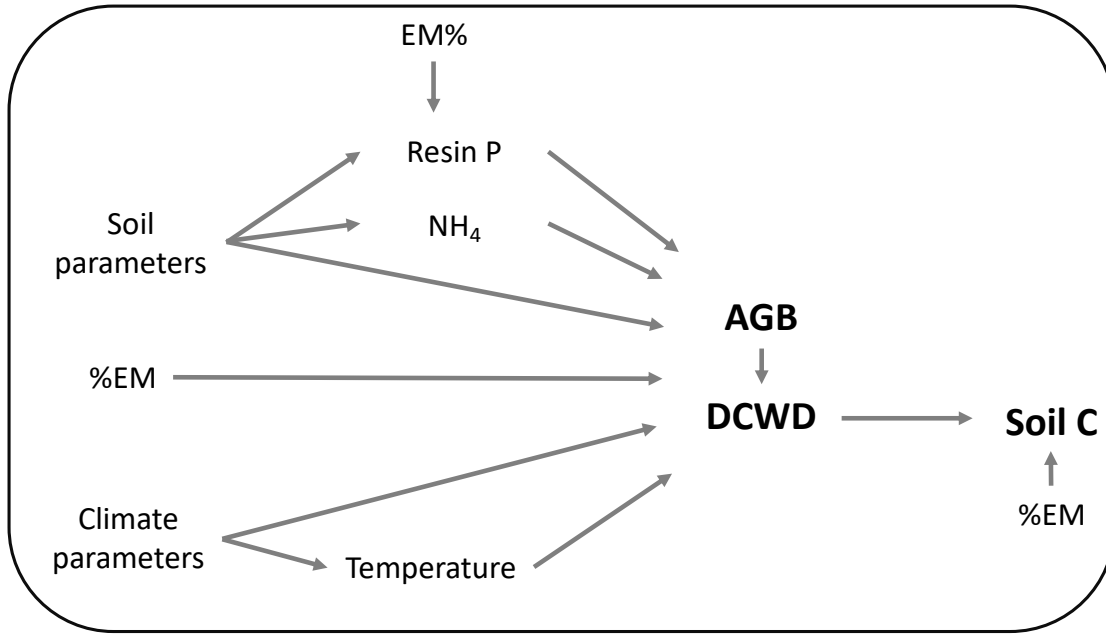

**Figure S2.** *A priori* structural equation model based on predicted relationships among environmental variables to evaluate the effect of environmental and edaphic variables on the different carbon pools in a montane forest.

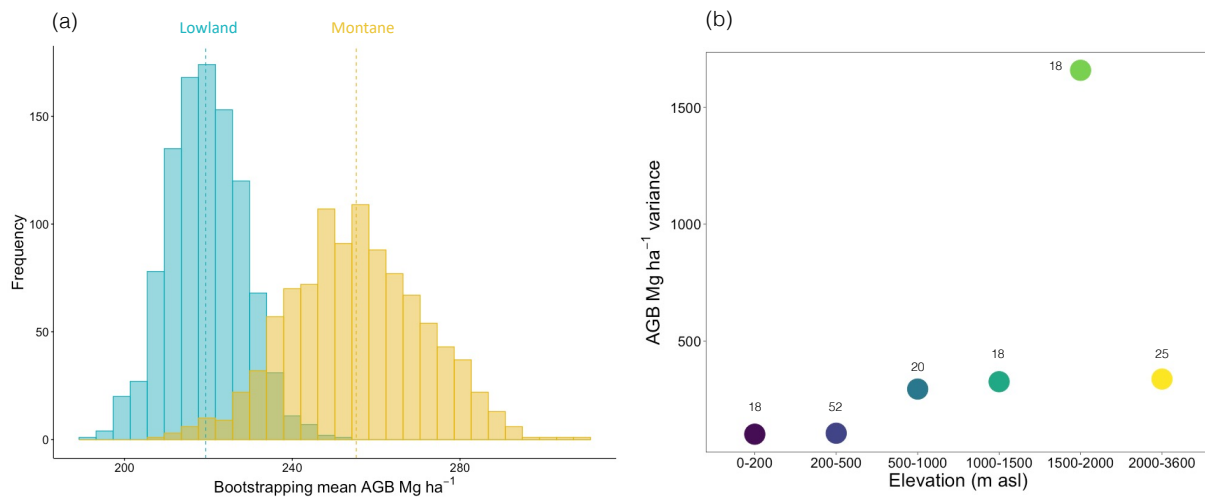

**Figure S3.** Variation in AGB by bootstrapping the mean AGB of 212 plots across twelve studies in Neotropical forests. Variation in AGB (a) between lowland forests and Montane forests and (b) across elevation categories. Numbers above data points represent the number of plots in each elevation category. Distributions were assessed by bootstrapping of 1000 resamples.

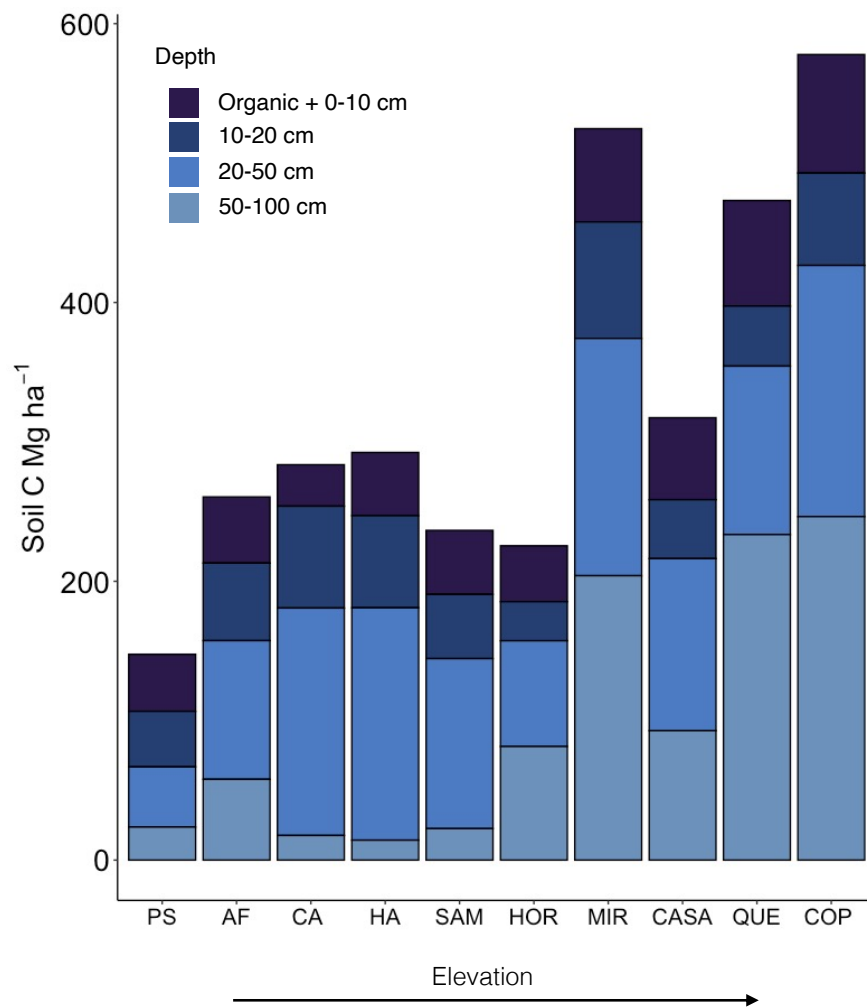

**Figure S4.** Variation in soil C at different depths among ten 1-ha plots in western Panama.



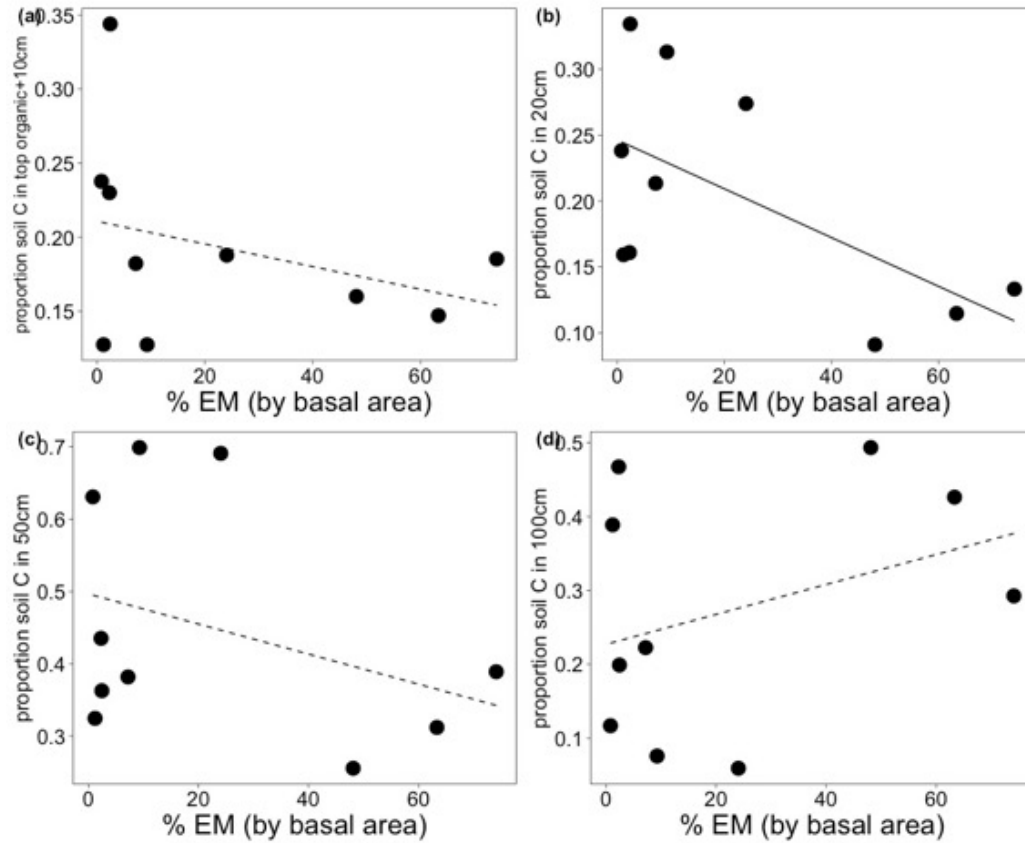

**Figure S5.** Relationship between percent of basal area contributed by EM associated tree species and soil C accumulation for ten 1-ha plots. Each point represents plot soil C at each depth. Solid line represents a significant basal area effect.
